# Supplementary material
Source: PubMed Central journal article supplement (PMC10134441)
Supplement: NIHMS1883853-supplement-Supporting_information.pdf [file NIHMS1883853-supplement-Supporting_information.pdf]

## Supporting Information Appendix

### Orally Administrable Therapeutic Synthetic Nanoparticle for Zika Virus

Bapurao Surnar,<sup>a,b</sup> Mohammad Z. Kamran,<sup>a,b§</sup> Anuj S. Shah,<sup>a§</sup> Uttara Basu,<sup>a</sup> Nagesh Kolishetti,<sup>a,f</sup> Sapna Deo,<sup>a,c</sup> Dushyantha T. Jayaweera,<sup>d,e</sup> Sylvia Daunert,<sup>a,b,c,d</sup> and Shanta Dhar<sup>\*a,b,c</sup>

*a. Department of Biochemistry and Molecular Biology, Leonard M. Miller School of Medicine, University of Miami, 1011 NW 15th St, Miami, FL 33136, USA*

*b. Dr. JT Macdonald Foundation Biomedical Nanotechnology Institute of the University of Miami, Leonard M. Miller School of Medicine, University of Miami, 1951 NW 7th Ave, Suite 475, Miami, FL 33136, USA*

*c. Sylvester Comprehensive Cancer Center, Leonard M. Miller School of Medicine, University of Miami, 1475 NW 12th Ave, Miami, FL 33136, USA*

*d. University of Miami Clinical and Translational Science Institute, Leonard M. Miller School of Medicine, University of Miami, 1120 NW 14th St, Suite 710, Miami, FL 33136, USA*

*e. Department of Medicine, Miami Center for AIDS Research, Leonard M. Miller School of Medicine, University of Miami, 1580 NW 10th Ave, Miami, FL 33136, USA*

*f. Department of Immunology and Nano-Medicine, Herbert Wertheim College of Medicine, Florida International University, Miami, FL, 33199, USA*

§M.Z.K. and A.S.S. contributed equally to this work.

\*To whom correspondence should be addressed.

E-mail: [shantadhar@med.miami.edu](mailto:shantadhar@med.miami.edu)

**Materials:** All chemicals were used as received without further purification unless otherwise mentioned. Ivermectin, N, N'-dicyclohexylcarbodiimide (DCC), 4-dimethylaminopyridine (DMAP), N-hydroxysuccinimide (NHS), 6-aminohexanoic acid, maleic anhydride, N,N-diisopropylethylamine (DIPEA), sucrose, and D-(+)-trehalose dihydrate were purchased from Sigma-Aldrich. Acid terminated poly(DL-lactide-co-glycolide) (PLGA-COOH) of inherent viscosity dL/g, 0.15 to 0.25 was purchased from Durect LACTEL<sup>®</sup> absorbable Polymers. Polyethylene glycol (H<sub>2</sub>N-PEG<sub>2000</sub>-NH<sub>2</sub>) was procured from JenKem Technology USA. Deuterated solvents, CDCl<sub>3</sub> and DMSO-d<sub>6</sub> were purchased from Cambridge Isotope Laboratories Inc. Regenerative cellulose membrane Amicon Ultra centrifugal 100 kDa filters were purchased from Merck Millipore Ltd. Strata C18-T columns (catalog number 8B-S004-EAK) were purchased from Phenomenex. Copper grids for transmission electron microscopy (TEM) were purchased from Electron Microscopy Sciences. Qdot<sup>®</sup> 705 ITK<sup>™</sup> Amino (PEG) Quantum Dots (catalog number Q21561MP) and ProLong<sup>®</sup> Gold anti-fade reagent with 4',6-diamidino-2-phenylindole (DAPI) were purchased from Life Technologies. Trans-well system polycarbonate (0.4- $\mu$ m pore size, 12-well plates) were purchased from Corning, Lowell, MA. The tight junction antibody ZO-1 (catalog number ab59720) was purchased from Abcam. Alexa Fluor 488 goat anti-rabbit IgG secondary antibody (catalog number A11008) was procured from Invitrogen, ThermoFisher Scientific. Phosphate buffered saline (1X PBS) was purchased from Gibco (reference number 10010-023). Goat serum was obtained from Sigma Aldrich (catalog number G9023). Glutamine, penicillin/streptomycin trypsin-EDTA solution, HEPES buffer (1 M in water), and sodium pyruvate were procured from Sigma Life Sciences. Dulbecco's Modified Eagle's medium

(DMEM) and fetal bovine serum (FBS) were purchased from Gibco Life Technologies. Mouse monoclonal IgG, Fc-Rn (A-6) (Catalog number SC-393064) was purchased from Santa Cruz Biotechnology. Zika virus NS1 antibody (EA88) (catalog number. MA5-24583) was purchased from Invitrogen. Flag-tagged Zika NS1 plasmid (Catalog number 79641) was procured from Addgene. Native human IgG FC fragment protein (catalog number Ab90285) was procured from Abcam. Ammonium persulfate (Catalog number 161-0180), tris/glycine/SDS buffer (Catalog number 161-0732), SDS-PAGE gel preparation kit TGX stain-free™ fast cast™ acrylamine 10% (Catalog number 161-0182), and Clarity™ western ECL substrate (Catalog number 170-5060) were purchased from Bio-Rad Inc. Beta-actin antibody (Catalog number ab8226), nitrocellulose membrane (catalog number 88018), and tween-20 was purchased from Fisher Bioreagents. Simulated gastric fluid (SGF) was purchased from Ricca chemical and Omeprazole was procured from Sigma.

**Instruments:**  $^1\text{H}$  and  $^{13}\text{C}$  NMR spectra were recorded on 400 MHz Bruker NMR spectrometer. Gel permeation chromatographic (GPC) analyses were performed on Shimadzu LC20-AD prominence S4 liquid chromatographer equipped with a refractive index detector and water columns; molecular weights were calculated using a conventional calibration curve constructed from narrow polystyrene standards using DMF as an eluent at a temperature of 40 °C. Dynamic light scattering (DLS) measurements were carried out using a Malvern Zetasizer Nano ZS system. Distilled water was purified by passage through a Millipore Milli-Q Biocel water purification system (18.2 M $\Omega$ ) containing a 0.22  $\mu\text{m}$  filter. Absorbance analyses were performed on a Bio-Tek Synergy HT microplate reader. High-performance liquid chromatography (HPLC) analyses were

made on an Agilent 1200 series instrument equipped with a multi-wavelength UV-visible and a fluorescence detector. Cells were counted using Countess® Automated Cell Counter procured from Invitrogen. TEM images were acquired using a JEOL JEM-1400 equipped with a Gatan Orius SC 200D CCD digital camera with a magnification of 80K. Inductively coupled plasma mass spectrometry (ICP-MS) studies were performed on an Agilent 7900 ICP-MS instrument. Mitochondrial bioenergetics assays were performed on XF<sup>e</sup>96 Extracellular Flux Analyzer (Agilent Seahorse Biosciences). TEER measurements were performed on a Millicell® ERS-2 Voltohmmeter Instrument (Catalog number MERS00002) purchased from Millipore. Confocal microscopy images were obtained using an Olympus FluoView FV3000. H and E images were captured using a Zeiss Stemi 2000-CS stereoscope fitted with a CL-1500 ECO SteREO light source.

|    | Title                                                                                                                                                                 | Citation                                                                                      | Procedure used in synthesis of NPs | Type of NPs         | Size (nm)<br>Zeta potential (mV) | % Loading<br>% EE     | Application                                            | Shortcomings                                                                                                                                                                                     |
|----|-----------------------------------------------------------------------------------------------------------------------------------------------------------------------|-----------------------------------------------------------------------------------------------|------------------------------------|---------------------|----------------------------------|-----------------------|--------------------------------------------------------|--------------------------------------------------------------------------------------------------------------------------------------------------------------------------------------------------|
| 1  | Polyanhydride Nanoparticle Delivery Platform Dramatically Enhances Killing of Filarial Worms                                                                          | <i>PLoS Negl Trop Dis</i> <b>2015</b> , <i>9</i> (10); e0004173                               | Solid/oil/oil nanoprecipitation    | Microparticles      | 250<br>Not provided              | 5%<br>Not Provided    | Reduce the microfilaria                                | <ul style="list-style-type: none"> <li>Incomplete characterization of NPs</li> <li>Non-spherical NPs</li> <li>Large size</li> <li>No targeting ability</li> <li>No antiviral activity</li> </ul> |
| 2  | Lipid Nanostructured Carriers Systems for Ivermectin and Methoprene Aiming Parasite Control                                                                           | <i>Quim. Nova.</i> <b>2016</b> , vol.39, n.9, pp.1034-1043                                    | Nanoprecipitation                  | Lipid nanoparticles | 210<br>Not provided              | 7%<br>Not provided    | Anti-parasitic treatment                               | <ul style="list-style-type: none"> <li>Incomplete characterization of NPs</li> <li>Large size</li> <li>No targeting ability</li> <li>No antiviral activity</li> </ul>                            |
| 3  | Ivermectin-loaded solid lipid nanoparticles: preparation, characterization, stability and transdermal behavior                                                        | <i>Artificial cells, Nanomedicine and Biotechnology</i> , <b>2018</b> , <i>46</i> (2), 255    | Hot homogenization                 | Lipid nanoparticles | 312<br>-30                       | 10%<br>98%            | Treatment of scabies.                                  | <ul style="list-style-type: none"> <li>Incomplete characterization of NPs</li> <li>Large size</li> <li>No targeting ability</li> <li>No antiviral activity</li> </ul>                            |
| 4  | Ivermectin-Loaded Polymeric Nanoparticles: Screening the Effects of Polymers, Methods, and the Usefulness of Mathematical Models                                      | <i>Journal of Nanoscience and Nanotechnology</i> , <b>2017</b> , <i>17</i> (6), pp. 4218-4234 | Nanoprecipitation                  | Nanocapsules        | 200<br>-30                       | 3%<br>Not provided    | Used to study Kormsmeier-Peppas's generalized equation | <ul style="list-style-type: none"> <li>Incomplete characterization of NPs</li> <li>Only mathematical models, no biological experimental evaluation</li> </ul>                                    |
| 5  | Ivermectin-loaded lipid nanocapsules: toward the development of a new antiparasitic delivery system for veterinary applications                                       | <i>Parasitology Research</i> <b>2016</b> , <i>115</i> (5), 1945-53                            | Hot homogenizations                | Lipid nanocapsules  | 55<br>-17                        | Not provided<br>98%   | Anti-parasitic treatment                               | <ul style="list-style-type: none"> <li>Incomplete characterization of NPs</li> <li>No targeting ability</li> <li>No antiviral activity</li> </ul>                                                |
| 6  | Liposomal Systems as Nanocarriers for the Antiviral Agent Ivermectin                                                                                                  | <i>International Journal of Biomaterials</i> Volume 2016, Article ID 8043983                  | Ethanol injection                  | Liposomes           | 30 to 350<br>Not provided        | Not provided<br>98%   | To treat Dengue Virus                                  | <ul style="list-style-type: none"> <li>No targeting ability</li> <li>Limited translational use due to large size</li> </ul>                                                                      |
| 7  | Design and in vitro characterization of ivermectin nanocrystals                                                                                                       | <i>Pharm Dev Technol.</i> <b>2017 Sep</b> ;22(6):809-817                                      | Emulsification                     | Nano suspensions    | 215<br>Not provided              | 1%<br>Not provided    | NP synthetic model                                     | <ul style="list-style-type: none"> <li>No targeting ability</li> <li>Not biodegradable</li> </ul>                                                                                                |
| 8  | Safety test of Ivermectin nanoemulsion on beef cattle                                                                                                                 | <i>Guangdong Nongye Kexue</i> (2014), <i>41</i> (2), 125-127                                  | Emulsification                     | Nano suspensions    | Not provided                     | 2%<br>Not provided    | Safety study                                           | <ul style="list-style-type: none"> <li>Incomplete characterization of NPs</li> <li>No targeting ability</li> <li>No antiviral activity</li> </ul>                                                |
| 9  | Preparation and property evaluation of ivermectin nanoemulsion for injection                                                                                          | <i>Xumu Shouyi Xuebao</i> (2011), <i>42</i> (8), 1161-1167                                    | Emulsification                     | Nano suspensions    | Not provided                     | 5%<br>Not provided    | NP synthetic model                                     | <ul style="list-style-type: none"> <li>No targeting ability</li> <li>Not biodegradable</li> <li>No pharmaceutical application</li> </ul>                                                         |
| 10 | Ivermectin lipid-based nanocarriers as novel formulations against head lice                                                                                           | <i>Parasitology research</i> (2017), <i>116</i> (8), 2111-2117                                | Phase inversion procedure          | Nanocapsules        | 55<br>Not provided               | 0.11%<br>Not provided | Against head lice                                      | <ul style="list-style-type: none"> <li>Incomplete characterization of NPs</li> <li>No targeting ability</li> <li>No antiviral activity</li> </ul>                                                |
| 11 | Therapeutic efficacy of poly (lactic-co-glycolic acid) nanoparticles encapsulated ivermectin (nanoivermectin) against Brugian filariasis in experimental rodent model | <i>Parasitology research</i> (2014), <i>113</i> (2), 681-91                                   | Nanoprecipitation                  | Nano-IVM            | 96<br>Not provided               | 74%<br>Not provided   | Brugian filariasis                                     | <ul style="list-style-type: none"> <li>Incomplete characterization of NPs</li> <li>No targeting ability</li> <li>No antiviral activity</li> </ul>                                                |

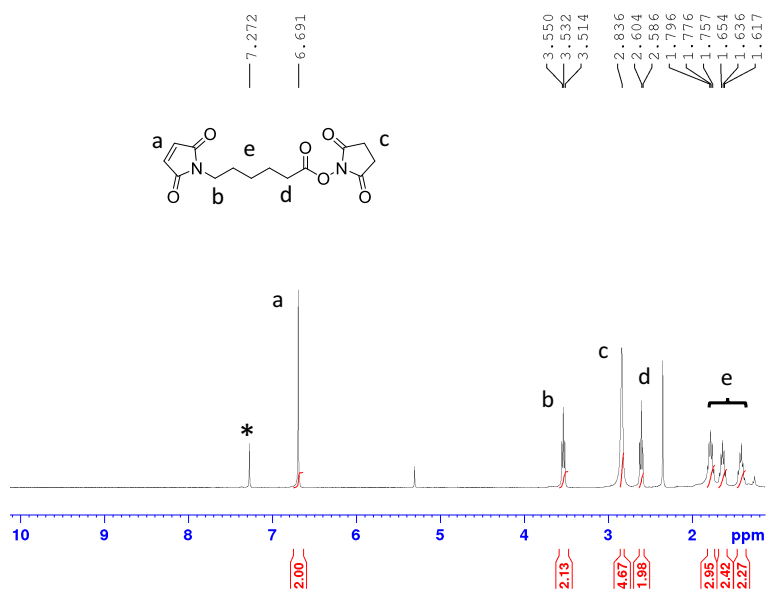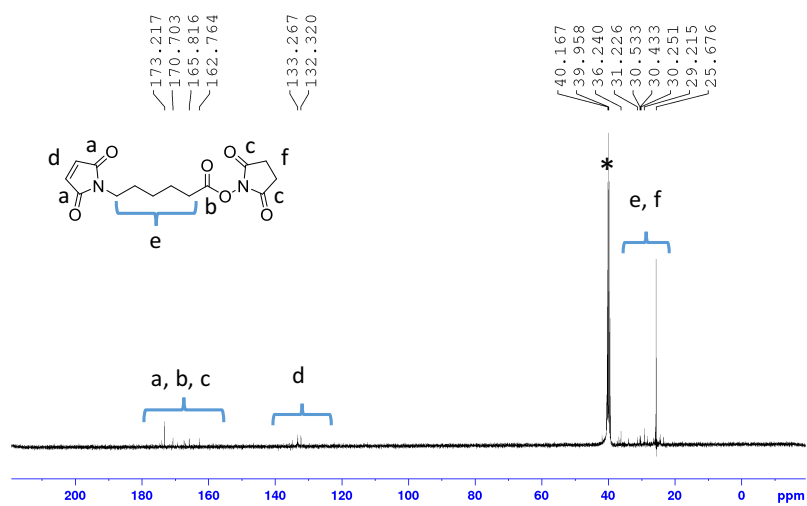

**Figure S1.** (A) <sup>1</sup>H NMR and (B) <sup>13</sup>C NMR of MAL-NHS in CDCl<sub>3</sub>.

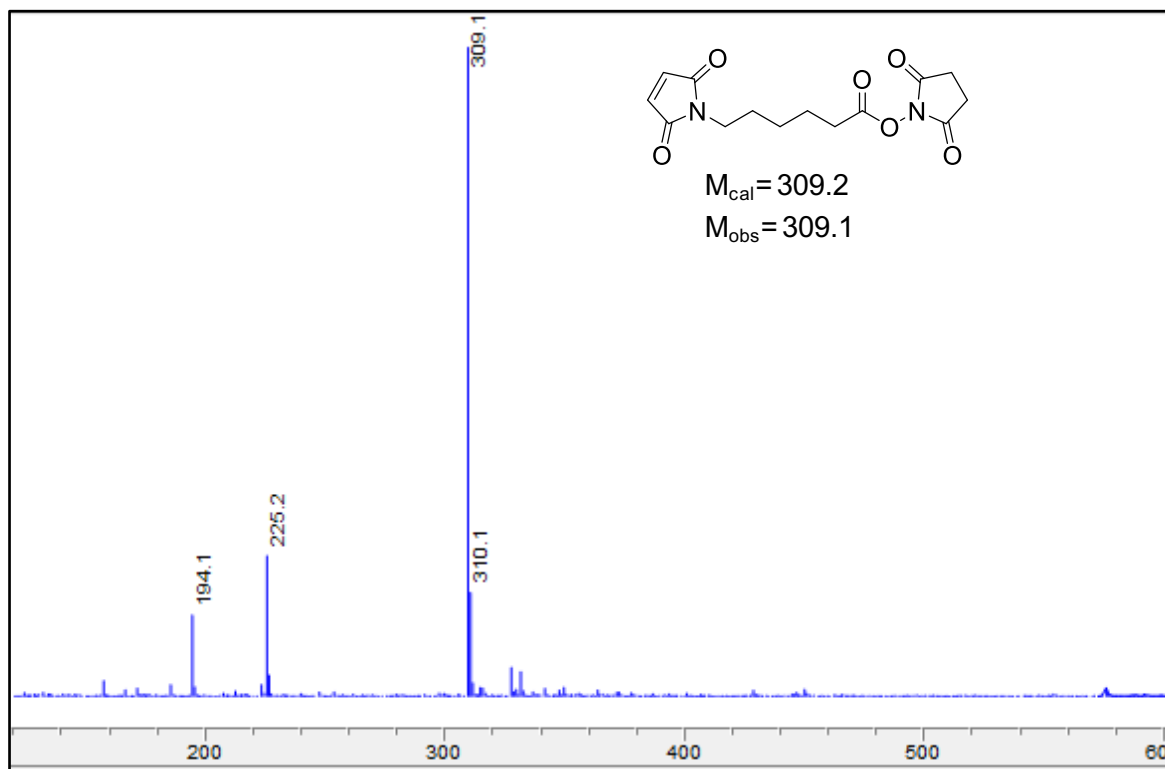

**Figure S2.** LC-MS-ESI of MAL-NHS.

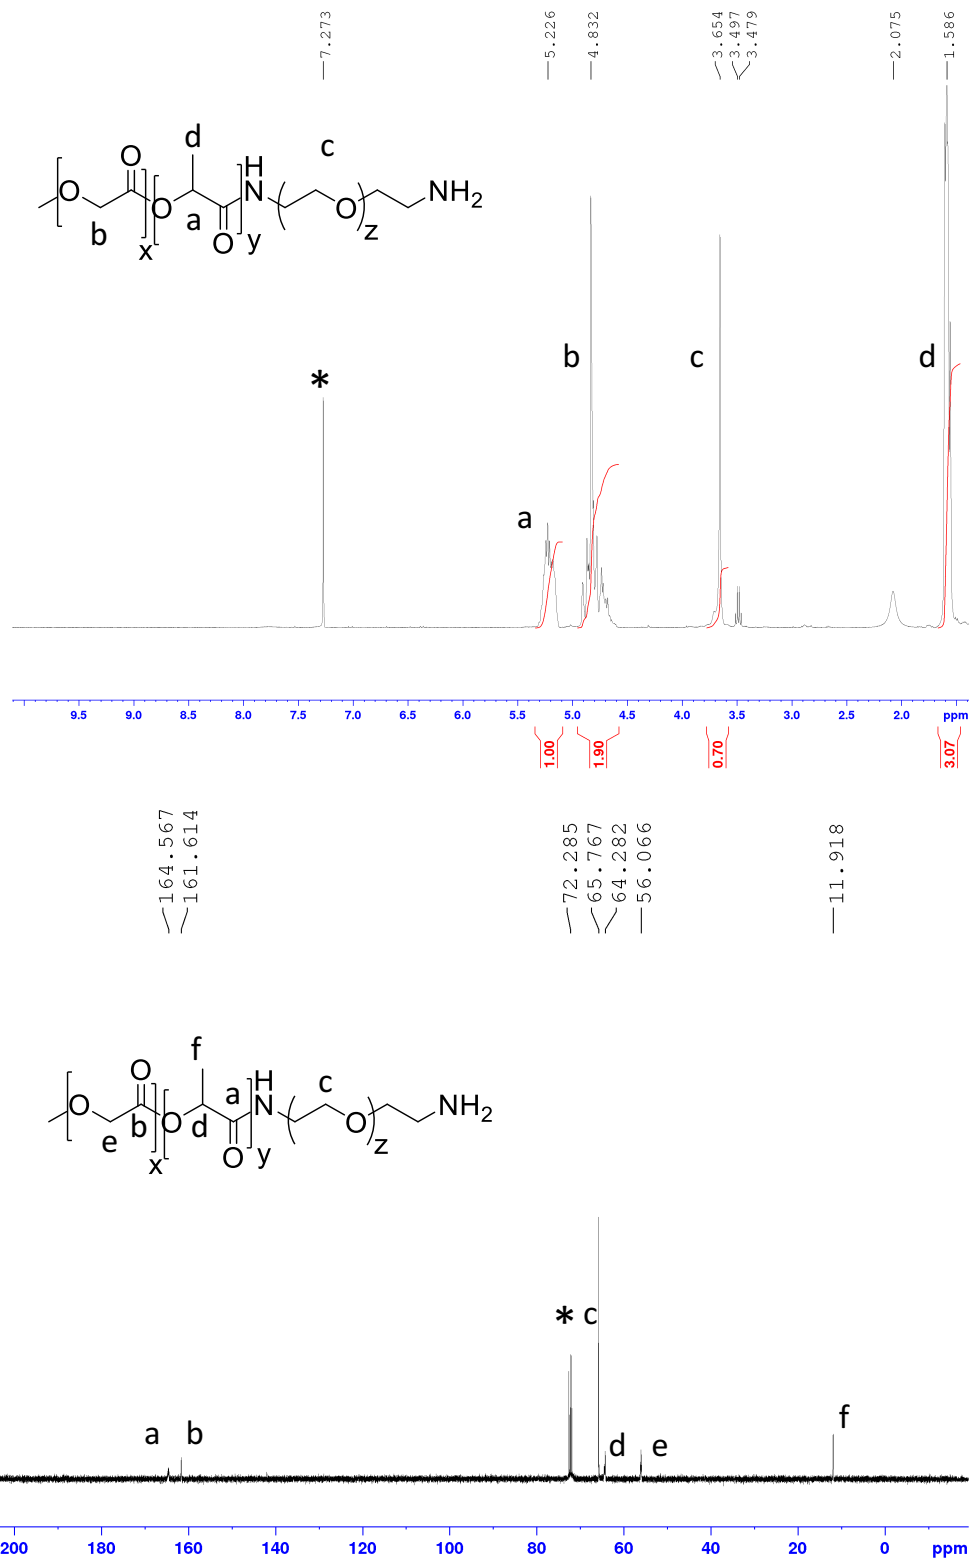

**Figure S3.** (A) <sup>1</sup>H NMR and (B) <sup>13</sup>C NMR of PLGA-*b*-PEG-NH<sub>2</sub> in CDCl<sub>3</sub>.



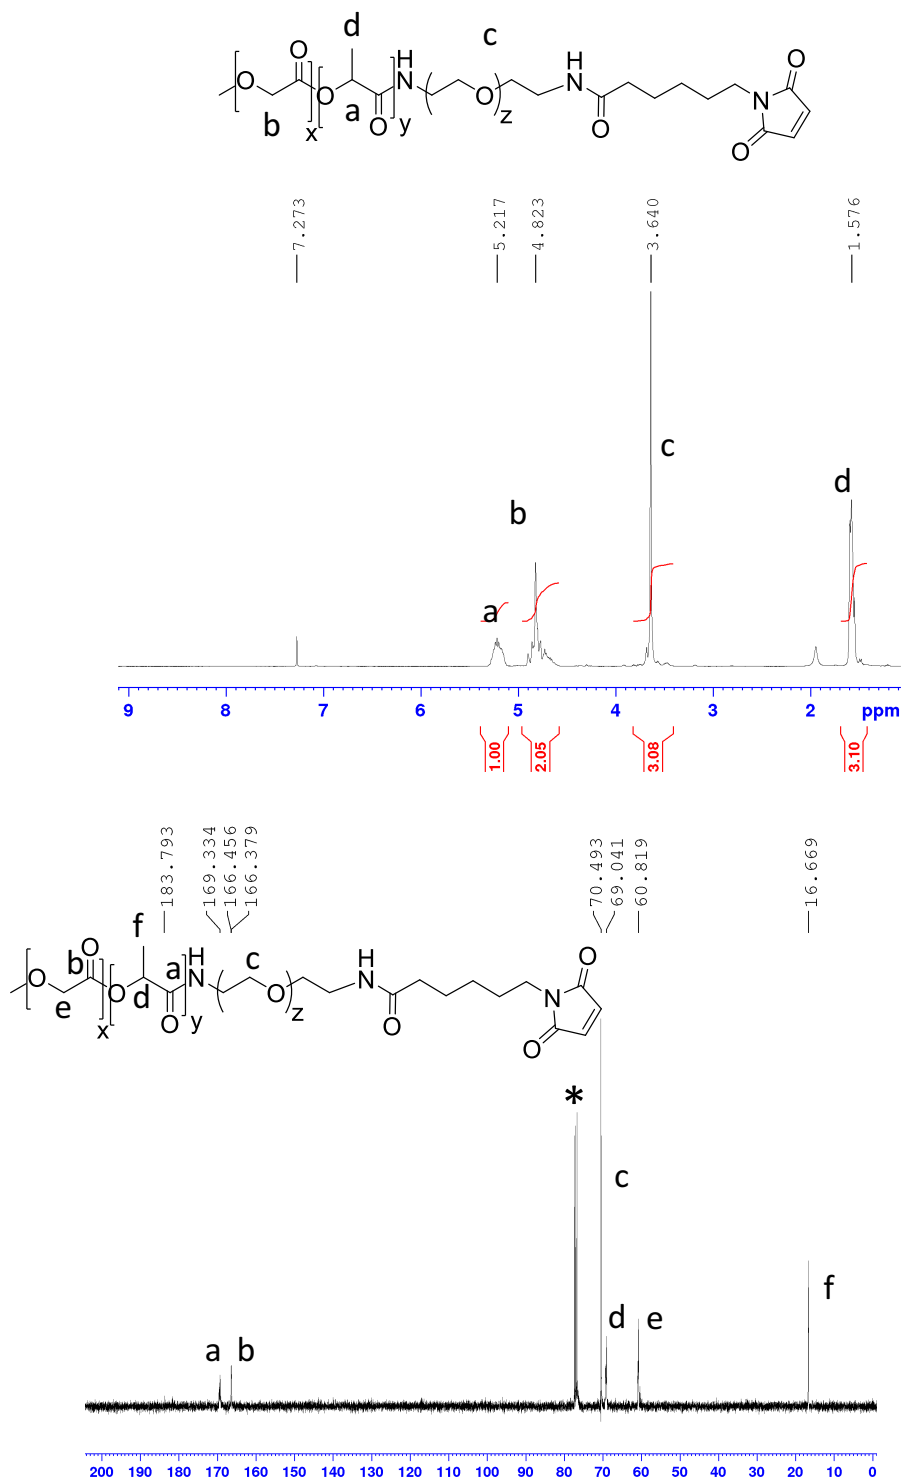

**Figure S4.** (A)  $^1\text{H}$  NMR and (B)  $^{13}\text{C}$  NMR of PLGA-*b*-PEG-MAL in  $\text{CDCl}_3$ .

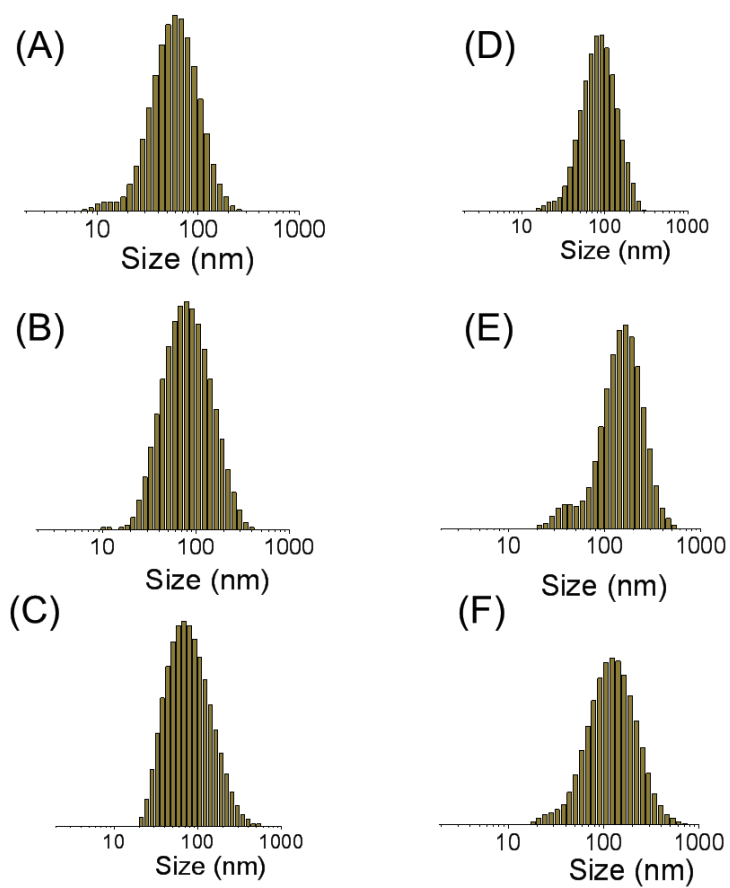

**Figure S5.** DLS histograms of (A) Mal-NP, (B) Mal-IVM10-NP, (C) Mal-IVM20-NP, (D) Mal-IVM30-NP, (E) Mal-IVM40-NP and (F) Mal-IVM50-NP in nanopure water at 37° C.

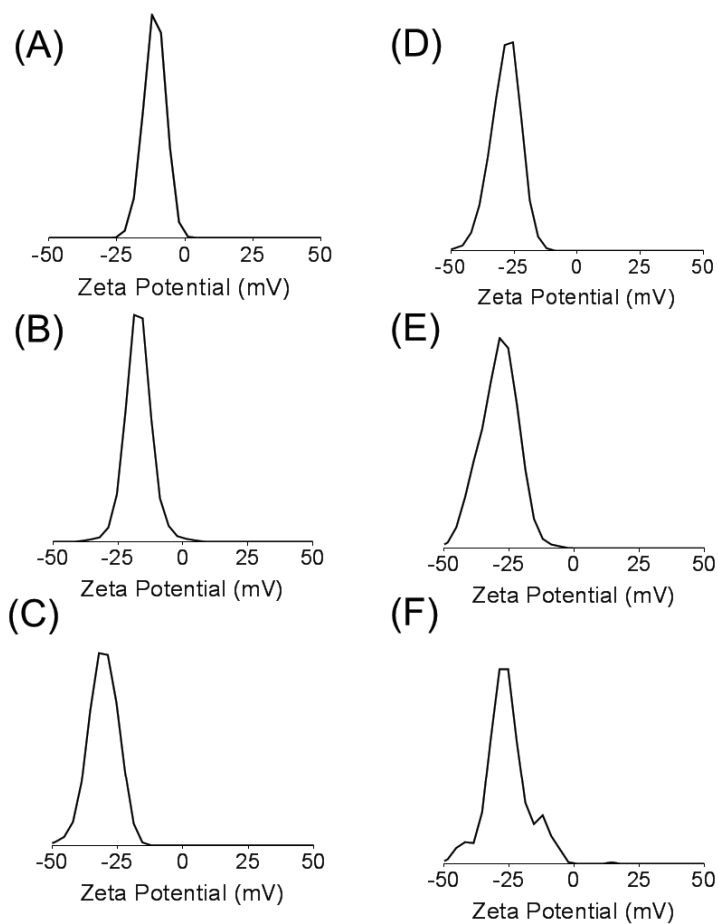

**Figure S6.** Zeta potential (mV) of (A) Mal-NP, (B) Mal-IVM10-NP, (C) Mal-IVM20-NP, (D) Mal-IVM30-NP, (E) Mal-IVM40-NP and (F) Mal-IVM50-NP in nanopure water at 37° C.

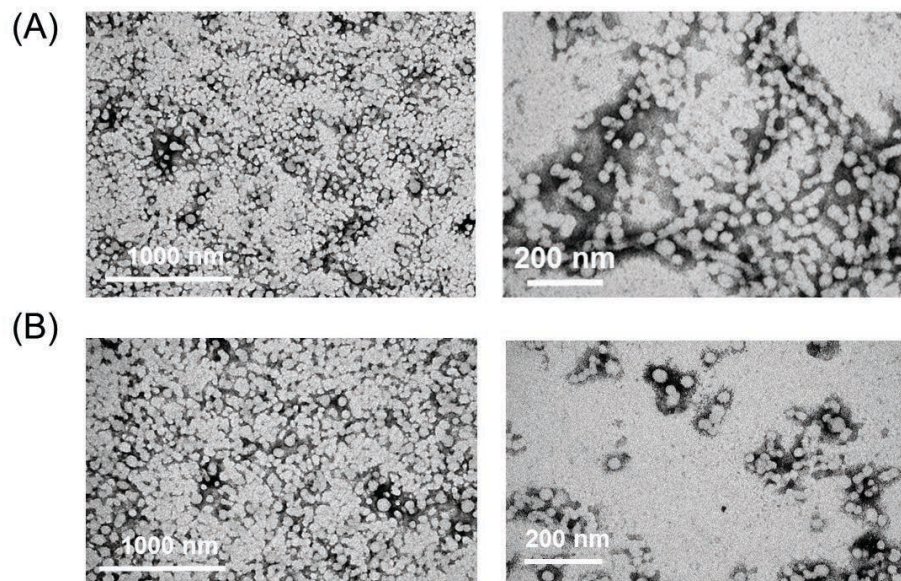

**Figure S7.** TEM images of (A) NT-Mal-NP and (B) NT-Mal-IVM-NP stained with 4% of uranyl acetate.

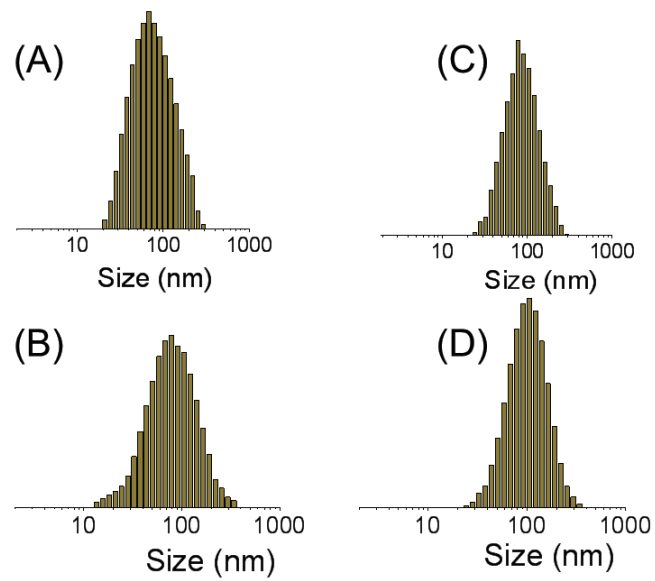

**Figure S8.** (A) DLS histograms of (A) NT-Mal-NP, (B) T-Fc-NP, (C) NT-Mal-IVM-NP, and (D) T-Fc-IVM-NP in nanopure water at 37° C.

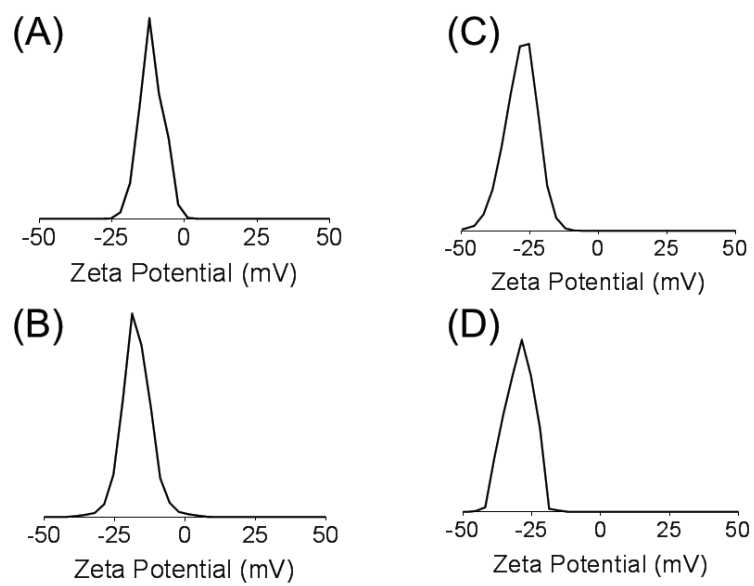

**Figure S9.** Zeta potential (mV) of (A) NT-Mal-NP, (B) T-Fc-NP, (C) NT-Mal-IVM-NP, and (D) T-Fc-IVM-NP in nanopure water at 37° C.

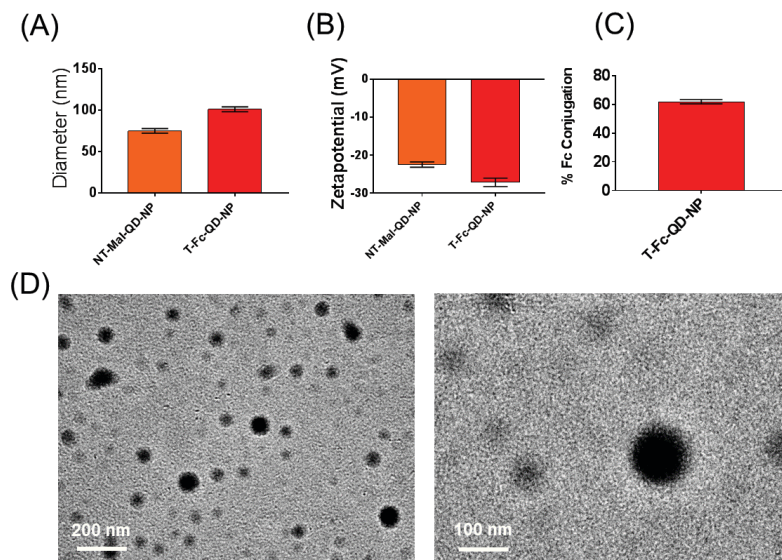

**Figure S10.** (A) Diameters, (B) Zeta potentials of NT-Mal-QD-NP and T-Fc-QD-NP. (C) Fc conjugation efficiency of targeted NPs by the bicinchoninic acid assay (BCA). (D) TEM images of T-Fc-QD-NP (unstained)

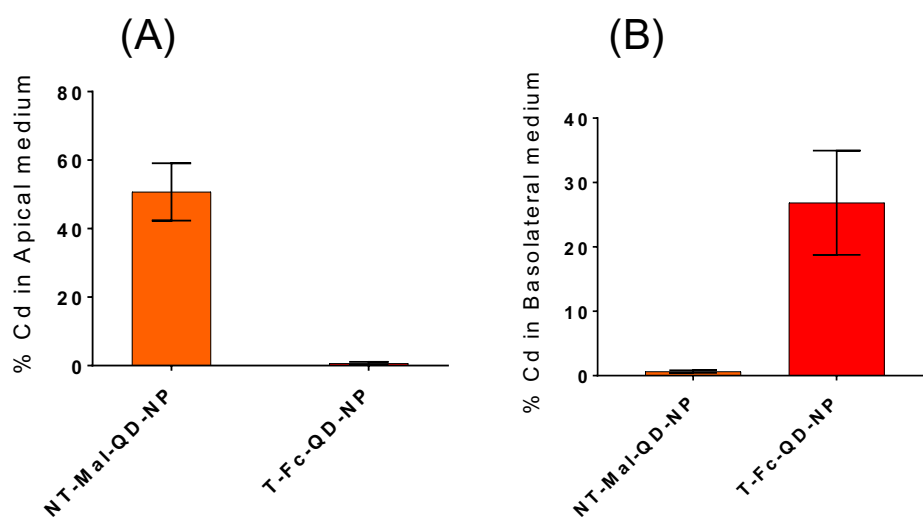

**Figure S11.** Quantification of QD (Cd) loaded NPs in the (A) apical and (B) basolateral sides of the endothelial cell barrier.

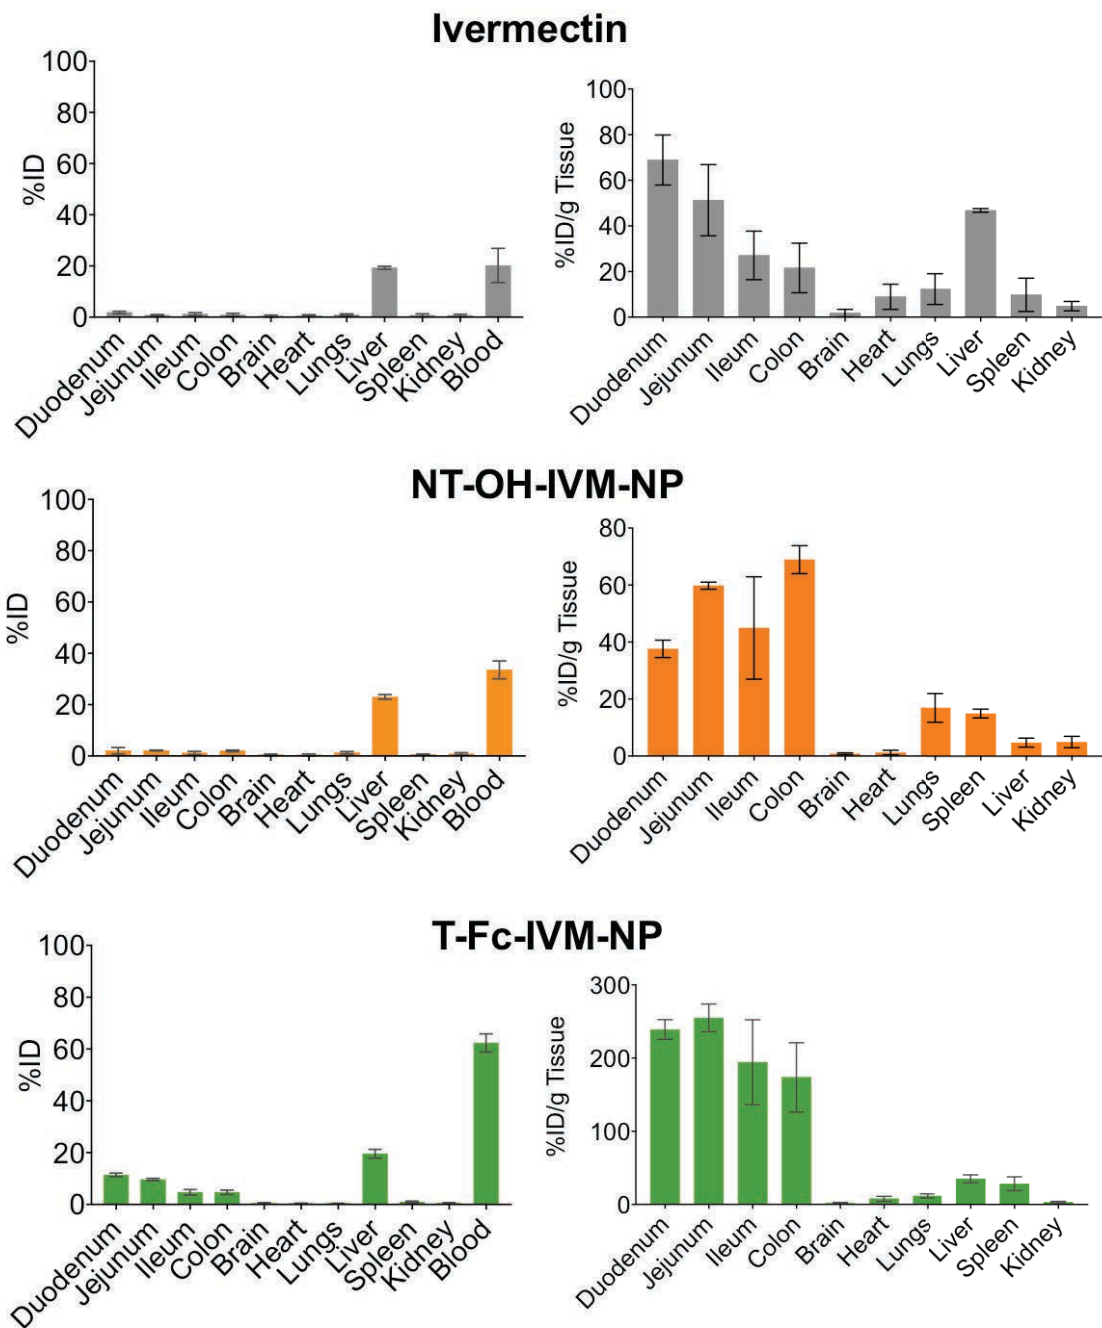

**Figure S12.** Biodistribution of ivermectin, NT-OH-IVM-NP, T-Fc-IVM-NP after oral administration to Balb/c albino mice. Data are mean %ID per gram of tissue  $\pm$  SD (n = 3 mice per group).



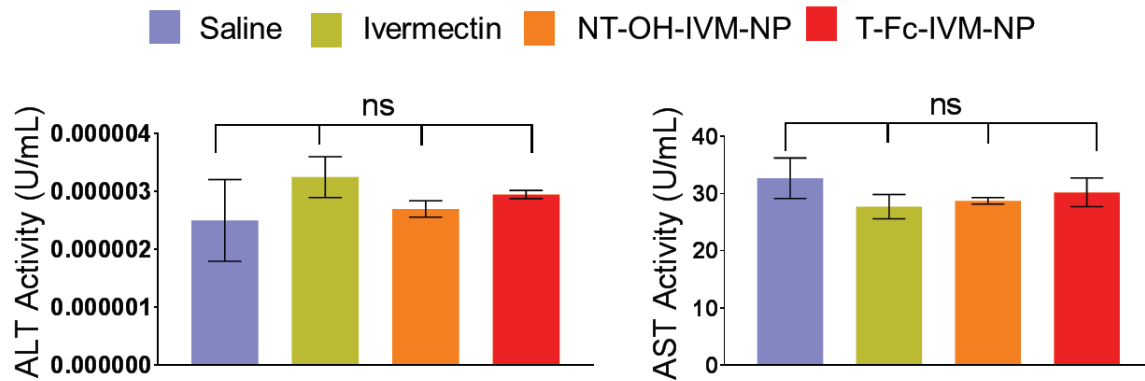

**Figure S13.** Alanine aminotransferase (ALT) and Aspartate Aminotransferase (AST) levels from the blood plasma of BALB/c mice (n=3 in each group) treated with single dose of articles (at a dose of 40 mg/kg with respect to ivermectin) *via* oral gavage for 24 h.

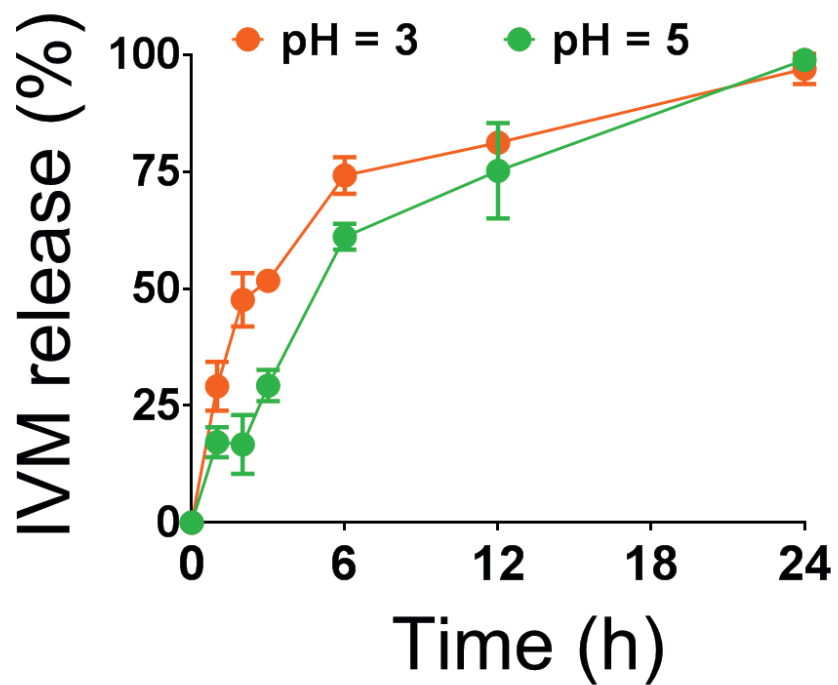

**Figure S14.** Release of IVM from NT-Mal-IVM-NPs at pH 3 and 5 at 37 °C

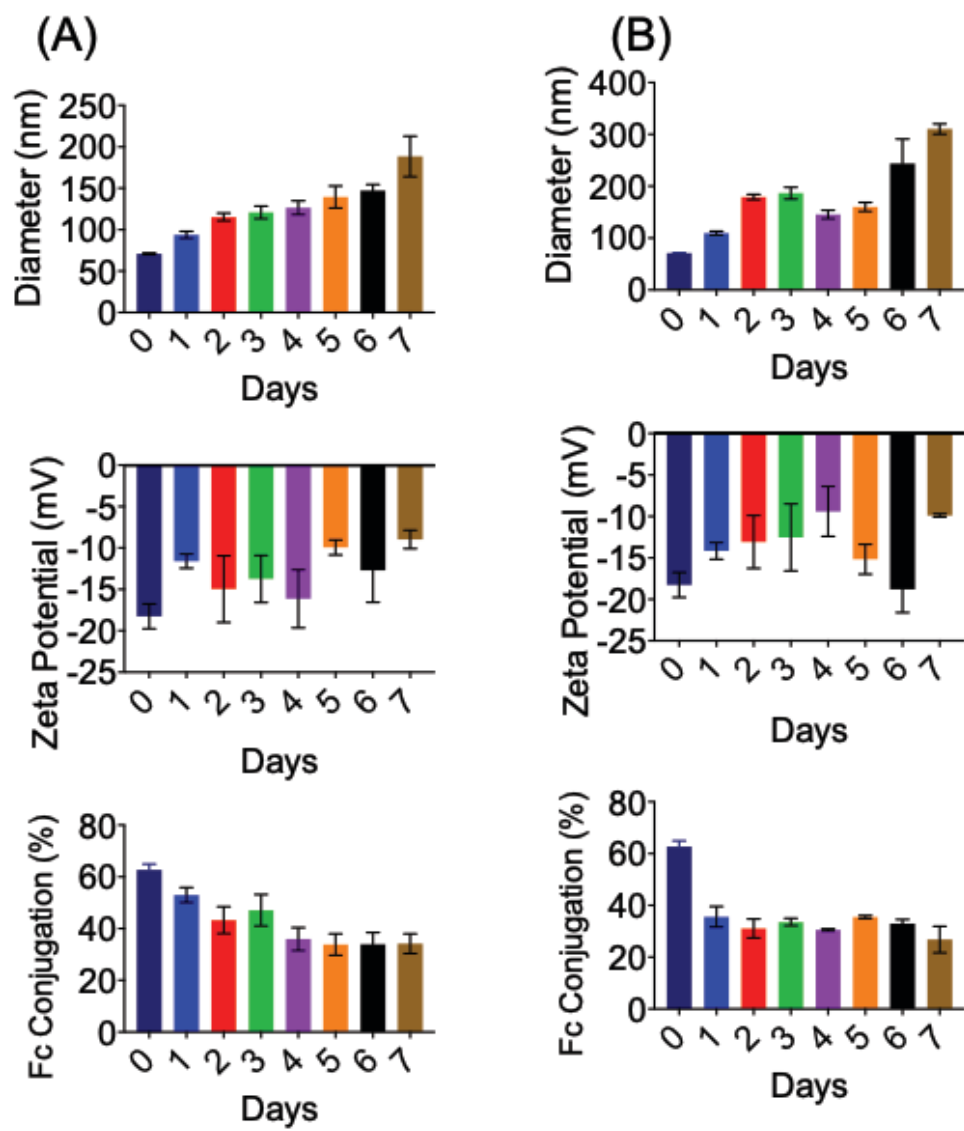

**Figure S15.** Stability of T-Fc-IVM-NP in simulated gastric fluid (SGF) at (A) room temperature and (B) 37 °C.

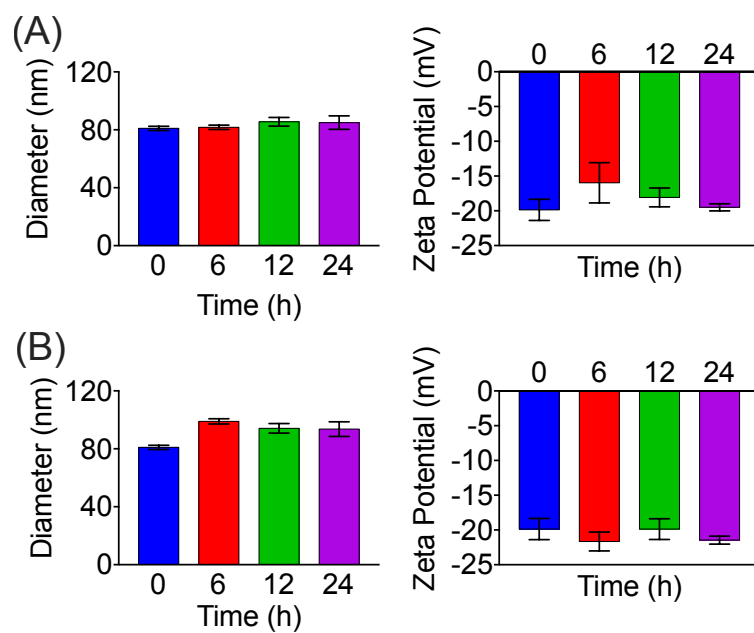

**Figure S16.** Stability of NT-Mal-IVM-NP in simulated gastric fluid (SGF) without (A) and with (B) Omeprazole at room temperature.

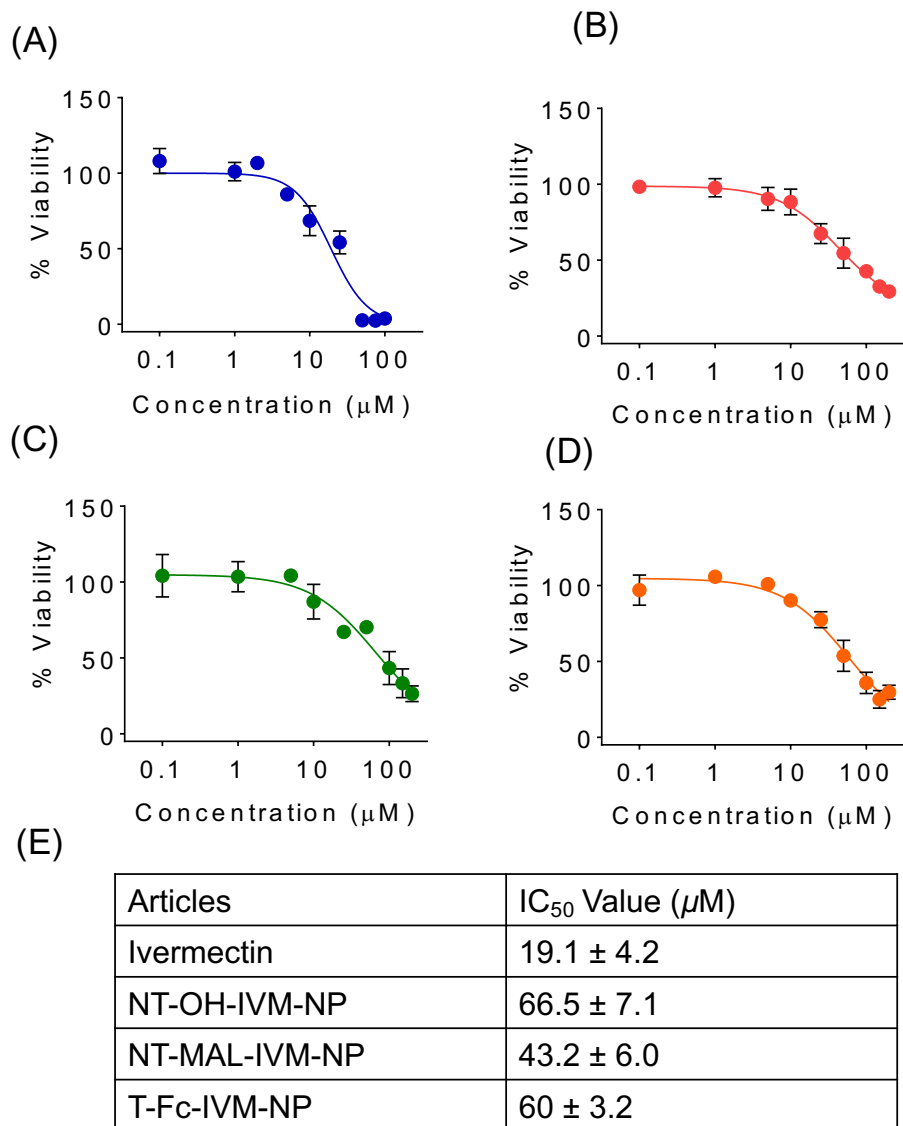

**Figure S17.** *In vitro* efficacy of (A) ivermectin, (B) NT-OH-IVM-NP, (C) NT-Mal-IVM-NP, and (D) T-Fc-IVM-NP in Caco-2 cells by the MTT assay. (E) IC<sub>50</sub> values of the articles in the Caco-2 cells after treatment for 72 h.

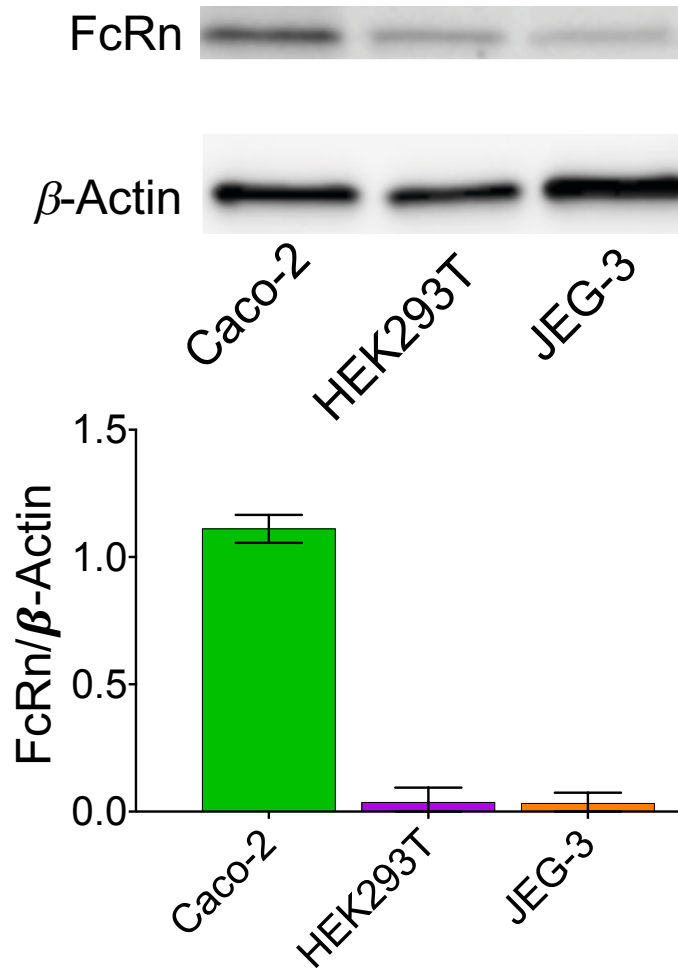

**Figure S18.** Comparison of FcRn expression level in Caco-2, HEK293T, and JEG-3 cells by western blotting.

After 180 Days

NT-Mal-IVM-NP

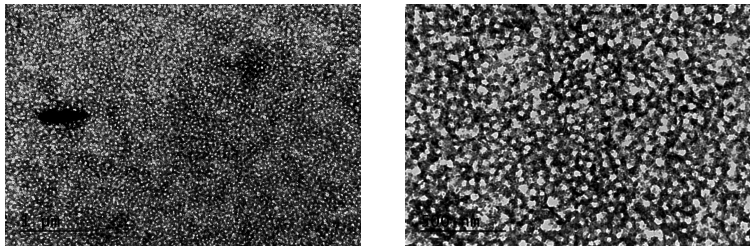

NT-Mal-IVM-NP:Trehalose

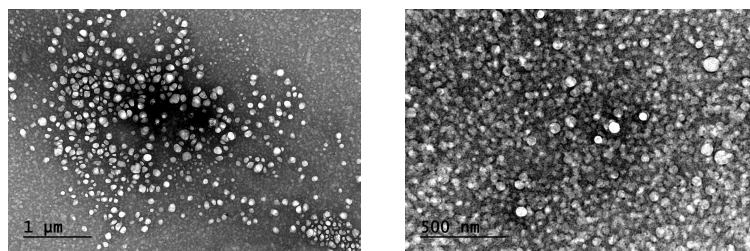

**Figure S19.** Morphological comparison of NT-Mal-IVM-NP and NT-Mal-IVM-NP with sucrose after 180 days by TEM.
